# Supplementary material
Source: Springer Nature journal article supplement (https://www.springermedizin.de/resource/supplementary/12872_2014_791_MOESM1_ESM.pdf/9430520)
Supplement: MOESM1 [file 9430520]

Supplementary Table 1A

| Patient# | Age/Sex | Comorbidities |    |    | Trigger                 | Presenting symptoms | ECG       |                    |           | Max TnT<br>ng/mL | Echocardiography       |           |                              |     |    | Therapy |     |              | Time to LVEF recup<br>days |
|----------|---------|---------------|----|----|-------------------------|---------------------|-----------|--------------------|-----------|------------------|------------------------|-----------|------------------------------|-----|----|---------|-----|--------------|----------------------------|
|          |         | HT            | HC | DM |                         |                     | QRS<br>ms | ST/T               | QTc<br>ms |                  | LVEF <sup>#</sup><br>% | IVS<br>mm | LVOT <sub>grad</sub><br>mmHg | SAM | MR | Inotrop | BBL | IABP<br>days |                            |
| 1        | 65/F    | +             | +  | -  | Asthma exacerbation     | Resp distress       | 94        | Neg T              | 393       | 0.2              | 48                     | 13        | < 20                         | -   | 0  | -       | -   | -            | 14d                        |
| 2        | 58/F    | -             | -  | -  | -                       | Card shock          | 104       | Neg T              | 441       | 2.1              | 22                     | 10        | < 20                         | -   | 1+ | +       | -   | 2d           | †                          |
| 3        | 38/F    | -             | -  | +  | Anaphylaxis – EpiPen®   | VF                  | 99        | STE                | 464       | 0.3              | 25                     | 9         | < 20                         | -   | 2  | -       | -   | -            | 10d                        |
| 4        | 56/F    | +             | -  | -  | Conflict at work        | Chest pain          | 82        | Neg T              | 422       | 1.3              | 42                     | 12        | < 20                         | -   | 1  | -       | -   | -            | 28d                        |
| 5        | 68/F    | +             | -  | -  | Tragic news – brother † | Chest pain          | 111       | Neg T              | 430       | 0.1              | 53                     | 11        | < 20                         | -   | 0  | -       | -   | -            | -                          |
| 6        | 57/M    | +             | +  | -  | -                       | Resp distress       | 84        | STE                | 401       | 3.5              | 40                     | 13        | < 20                         | -   | 1  | -       | -   | -            | 28d                        |
| 7        | 78/F    | -             | +  | -  | -                       | Chest pain          | 87        | STE                | 492       | 0.4              | 31                     | 8         | 28                           | +   | 2  | -       | -   | -            | -                          |
| 8        | 66/F    | +             | -  | -  | Missed appointment      | Chest pain          | 93        | STE                | 400       | 1.0              | 34                     | 12        | 40                           | +   | 3  | -       | +   | -            | 42d                        |
| 9        | 77/F    | -             | +  | -  | Dental surgery          | Chest pain          | 117       | NegT               | 414       | 0.6              | 46                     | 10        | < 20                         | -   | 1  | -       | -   | -            | 42d                        |
| 10       | 60/F    | -             | -  | -  | -                       | Resp distress       | 98        | QS <sub>V1-4</sub> | 400       | 2.3              | 30                     | 9         | < 20                         | -   | 0  | +       | -   | -            | †                          |
| 11       | 52/F    | +             | -  | -  | RF ablation (PVI)       | Resp distress       | 124       | LBBB               | 386       | 0.3              | 48                     | 12        | < 20                         | -   | 1  | -       | -   | -            | 21d                        |
| 12       | 74/F    | +             | -  | -  | -                       | Card shock          | 91        | STE                | 417       | 1.3              | 37                     | 13        | 149                          | +   | 2  | +       | -   | 4d           | 28d                        |
| 13       | 51/F    | +             | -  | -  | Exercise - tachycardia  | Resp distress       | 95        | -                  | 393       | 0.9              | 48                     | 11        | < 20                         | -   | 1  | -       | -   | -            | -                          |
| 14       | 58/F    | -             | -  | -  | Dehydration             | Chest pain          | 104       | STE                | 405       | 0.5              | 34                     | 10        | < 20                         | -   | 2  | -       | -   | -            | 21d                        |
| 15       | 67/F    | -             | -  | -  | Abdominal surgery       | Chest pain          | 89        | STE                | 382       | 0.5              | 45                     | 11        | < 20                         | -   | 1  | -       | -   | -            | 14d                        |
| 16       | 31/F    | -             | -  | -  | -                       | Card shock          | 95        | NegT               | 460       | 1.6              | 19                     | 9         | < 20                         | -   | 1+ | +       | -   | 5d           | 14d                        |

Age: years. Sex: F, female; M, male. Comorbidities: HT, hypertension; HC, hypercholesterolemia; DM, diabetes mellitus. Trigger: RF, radiofrequency; PVI, pulmonary vein isolation. Presenting symptoms: Resp distress, respiratory distress; Card shock, cardiogenic shock; VT/VF, ventricular tachycardia/fibrillation. ECG: Neg T, negative T-waves; STE, ST elevations; LBBB, left bundle branch block; STD, ST depressions. Max TnT, maximal troponin T value (ng/ml; cut-off value 0.035). Echocardiography: LVEF, LV ejection fraction (%); IVS, interventricular septum (mm; septal bulge if ≥ 12 mm). LVOT<sub>grad</sub>, left ventricular outflow tract gradient (mmHg); SAM, systolic anterior motion of the anterior mitral valve leaflet; MR, mitral regurgitation grade on a scale of 4. Therapy: Inotrop, inotropics i.v.; BBL, beta-blocker i.v.; IABP, intra-aortic balloon pump. Time to LVEF recup, LVEF recuperation = LVEF ≥ 55% (days). <sup>#</sup> LVEF as calculated on LV angiogram (and confirmed on transthoracic echocardiography).

Supplementary Table 1B

| Patient# | Age/Sex | Comorbidities |    |    | Trigger                   | Presenting symptoms | ECG       |       |           | Max TnT<br>ng/mL | Echocardiography       |           |                              |     |    | Therapy |     |              | Time to LVEF recup<br>days |
|----------|---------|---------------|----|----|---------------------------|---------------------|-----------|-------|-----------|------------------|------------------------|-----------|------------------------------|-----|----|---------|-----|--------------|----------------------------|
|          |         | HT            | HC | DM |                           |                     | QRS<br>ms | ST/T  | QTc<br>ms |                  | LVEF <sup>#</sup><br>% | IVS<br>mm | LVOT <sub>grad</sub><br>mmHg | SAM | MR | Inotrop | BBL | IABP<br>days |                            |
| 17       | 36/M    | +             | -  | -  | -                         | Chest pain          | 91        | Neg T | 448       | 3.6              | 40                     | 9         | < 20                         | -   | 1  | -       | -   | -            | 10d                        |
| 18       | 76/F    | -             | +  | -  | Conflict with husband     | Chest pain          | 96        | STE   | 399       | 0.5              | 38                     | 10        | < 20                         | -   | 1  | +       | -   | 3d           | 5d                         |
| 19       | 74/F    | +             | -  | -  | Cardioversion – anxiety   | Chest pain          | 113       | STE   | 403       | 0.9              | 61                     | 13        | < 20                         | -   | 1  | -       | -   | -            | -                          |
| 20       | 93/F    | +             | -  | -  | Chronic stress            | Chest pain          | 100       | STE   | 417       | 1.0              | 43                     | 9         | < 20                         | -   | 2  | -       | -   | -            | 28d                        |
| 21       | 83/F    | +             | -  | +  | -                         | Resp distress       | 97        | Neg T | 392       | 1.2              | 48                     | 12        | 32                           | +   | 2  | -       | -   | -            | -                          |
| 22       | 84/F    | +             | +  | -  | Acute low back pain       | Card shock          | 83        | Neg T | 425       | 0.3              | 38                     | 14        | 35                           | +   | 2+ | +       | -   | -            | 7d                         |
| 23       | 83/F    | -             | -  | -  | Car accident              | Chest pain          | 88        | STD   | 427       | 0.7              | 34                     | 10        | < 20                         | -   | 1  | +       | -   | 3d           | 5d                         |
| 24       | 71/F    | -             | -  | -  | Acute diverticulitis      | Chest pain          | 98        | STE   | 430       | 1.5              | 35                     | 9         | < 20                         | -   | 1  | -       | -   | -            | 14d                        |
| 25       | 52/F    | -             | -  | -  | Panic attack – house fire | Chest pain          | 95        | STD   | 412       | 0.2              | 44                     | 8         | < 20                         | -   | 1+ | -       | -   | -            | 5d                         |
| 26       | 58/F    | +             | -  | -  | Thyroid surgery           | Chest pain          | 92        | Neg T | 397       | 0.1              | 63                     | 12        | < 20                         | -   | 1  | -       | -   | -            | 7d                         |
| 27       | 75/F    | +             | +  | -  | -                         | Card shock          | 101       | STE   | 484       | 0.8              | 40                     | 13        | 64                           | +   | 2  | -       | +   | 3d           | 14d                        |
| 28       | 71/F    | -             | -  | -  | Myasthenia gravis crisis  | Resp distress       | 96        | STE   | 470       | 0.5              | 39                     | 10        | < 20                         | -   | 0  | +       | -   | 4d           | 28d                        |
| 29       | 83/F    | -             | -  | +  | Fall at home – anxiety    | Chest pain          | 89        | STE   | 402       | 1.3              | 28                     | 11        | < 20                         | -   | 1  | +       | -   | 3d           | 42d                        |
| 30       | 69/F    | +             | -  | -  | -                         | VT                  | 105       | Neg T | 474       | 0.7              | 55                     | 12        | < 20                         | -   | 1+ | -       | -   | -            | 10d                        |
| 31       | 74/F    | +             | -  | -  | COPD exacerbation         | Resp distress       | 94        | STE   | 405       | 0.3              | 39                     | 9         | < 20                         | -   | 1  | -       | -   | 3d           | -                          |
| 32       | 76/F    | +             | +  | -  | Migraine attack           | Chest pain          | 92        | STD   | 394       | 1.1              | 50                     | 11        | < 20                         | -   | 1  | -       | -   | -            | 14d                        |

Age: years. Sex: F, female; M, male. Comorbidities: HT, hypertension; HC, hypercholesterolemia; DM, diabetes mellitus. Trigger: COPD, chronic obstructive pulmonary disease. Presenting symptoms: Resp distress, respiratory distress; Card shock, cardiogenic shock; VT/VF, ventricular tachycardia/fibrillation. ECG: Neg T, negative T-waves; STE, ST elevations; LBBB, left bundle branch block; STD, ST depressions. Max TnT, maximal troponin T value (ng/ml; cut-off value 0.035). Echocardiography: LVEF, LV ejection fraction (%); IVS, interventricular septum (mm; septal bulge if  $\geq 12$  mm). LVOT<sub>grad</sub>, left ventricular outflow tract gradient (mmHg); SAM, systolic anterior motion of the anterior mitral valve leaflet; MR, mitral regurgitation grade on a scale of 4. Therapy: Inotrop, inotropics i.v.; BBL, beta-blocker i.v.; IABP, intra-aortic balloon pump. Time to LVEF recup, LVEF recuperation = LVEF  $\geq 55\%$  (days). <sup>#</sup> LVEF as calculated on LV angiogram (and confirmed on transthoracic echocardiography).
